# Supplementary material for: MicroRNA inhibition fine-tunes and provides robustness to the restriction point switch of the cell cycle
Source: PubMed Central journal article supplement (PMC5017317; doi:10.1038/srep32823), 2016-09-09
Supplement: srep32823-s1.pdf [file srep32823-s1.pdf]

# MicroRNA inhibition fine-tunes and provides robustness to the restriction point switch of the cell cycle

Ricardo C.H. del Rosario<sup>1,\*</sup>, Joseph Ray Clarence G. Damasco<sup>2</sup>, Baltazar D. Aguda<sup>3,\*</sup>

1. Stanley Center for Psychiatric Research, Broad Institute of MIT and Harvard, Cambridge MA 02142, USA
2. Institute of Mathematics, University of the Philippines, Diliman, Quezon City 1101 Philippines
3. Philippine Genome Center, University of the Philippines, Diliman, Quezon City 1101 Philippines

\*Correspondence and requests for material should be sent to: R.C.H.d.R (email: [rcdelros@broadinstitute.org](mailto:rcdelros@broadinstitute.org)) or B.D.A (email: [bdaguda@up.edu.ph](mailto:bdaguda@up.edu.ph)).

## SUPPLEMENTARY MATERIAL

### Noise Amplification

We provide the elements of the matrices that are involved in the linear system that arises from the steady-state normalized FDT<sup>39</sup>

$$M\eta + \eta M^T + D = 0.$$

The components of the matrices  $\eta$ ,  $M$  and  $D$  are given by

$$\eta_{ij} = \frac{\sigma_{ij}}{X_i X_j}, M_{ij} = \frac{X_j}{X_i} A_{ij}, D_{ij} = \frac{B_{ij}}{X_i X_j}, i, j = 0, \dots, 8.$$

The elements  $A_{ij}$  come from the *elasticities*<sup>31, 39, 40</sup>

$$A_{ij} = -\frac{F_i}{X_j} \frac{\partial \ln(F_i(X_0, X_1, \dots, X_8))}{\partial \ln(X_j)}, i = 1, \dots, 8, j = 0, \dots, 8$$

$$A_{0j} = \begin{cases} 1/\tau_0 & j = 0 \\ 0 & j \neq 0. \end{cases}$$

$B$  is the diffusion matrix<sup>31, 39, 40</sup> with elements

$$B_{ij} = \sum_k v_{jk} v_{ik} R_k, i = 1, \dots, 8, j = 0, \dots, 8,$$

where the reaction  $k$  occurs with rate  $R_k$  and produces  $v_{ik}$  molecules of species  $i$ . Thus,

$$B = \begin{bmatrix} 2/(\tau_0 X_0) & 0 & 0 & 0 & 0 & 0 & 0 & 0 & 0 \\ 0 & b_{11} & 0 & 0 & 0 & 0 & 0 & 0 & 0 \\ 0 & 0 & b_{22} & 0 & 0 & 0 & b_{27} & 0 & 0 \\ 0 & 0 & 0 & b_{33} & 0 & 0 & 0 & 0 & 0 \\ 0 & 0 & 0 & 0 & b_{44} & 0 & 0 & 0 & 0 \\ 0 & 0 & 0 & 0 & 0 & b_{55} & b_{56} & b_{57} & 0 \\ 0 & 0 & 0 & 0 & 0 & b_{65} & b_{66} & b_{67} & 0 \\ 0 & 0 & b_{72} & 0 & 0 & b_{75} & b_{76} & b_{77} & 0 \\ 0 & 0 & 0 & 0 & 0 & 0 & 0 & 0 & b_{88} \end{bmatrix}$$

where

$$\begin{aligned} b_{11} &= v_1 + d_M X_1 & b_{65} &= b_{56} \\ b_{22} &= v_3 + v_7 + v_8 + d_E X_2 & b_{66} &= v_7 + v_9 + v_{10} + d_{RP} X_6 \\ b_{27} &= v_7 + v_8 & b_{67} &= v_7 \\ b_{33} &= v_2 + v_5 + d_{CD} X_3 & b_{72} &= b_{27} \\ b_{44} &= v_4 + d_{CD} X_4 & b_{75} &= b_{57} \\ b_{55} &= v_6 + v_{10} + v_8 + v_9 + d_R X_5 & b_{76} &= b_{67} \\ b_{56} &= v_9 + v_{10} & b_{77} &= v_8 + v_7 + d_{RE} X_7 \\ b_{57} &= v_8 & b_{88} &= v_{11} + d_\mu X_8. \end{aligned}$$

The parameter  $\tau_0$  is the average lifetime of  $X_0$ . We used the value 0.1 in our calculations, but this value did not affect the qualitative trends we showed in Fig. 5 and Supplementary Figs. 2-6.

### The model of Aguda *et al.* (2008)

The two-dimensional A model represents a simplified microRNA regulatory network involving miR-17-92 and the transcription factors c-Myc and E2F. The dimensionless kinetic equations are given below, where  $\phi$  is the dimensionless concentration of the protein  $p$ , and  $\mu$  is the dimensionless concentration of the miR cluster  $m$

$$\varepsilon \frac{d\phi}{dt} = \alpha' + \left( \frac{\kappa \phi^2}{\Gamma_1 + \phi^2 + \Gamma_2 \mu} \right) - \phi$$

$$\frac{d\mu}{dt} = 1 + \phi - \mu,$$

with non-dimensionalized parameters

$$\begin{aligned} \phi &= \left( \frac{k_2}{\beta} \right) p, & \mu &= \left( \frac{\gamma}{\beta} \right) m, & \tau &= \gamma t \\ \varepsilon &= \frac{\gamma}{\delta}, & \alpha' &= \left( \frac{k_2}{\delta \beta} \right) \alpha, & \kappa &= \frac{k_1 k_2}{\delta \beta}. \\ \Gamma_1' &= \left( \frac{k_2^2}{\beta^2} \right) \Gamma_1 & \Gamma_2' &= \left( \frac{k_2^2}{\beta \gamma} \right) \Gamma_2. \end{aligned}$$

**Supplementary Table 1. Number of cells in the on and off states in Figure 4.**

MiRNA strengths: 1 ( $\Gamma_E = \Gamma_M = 0$ ; no miR); 2 ( $\Gamma_E = 6.3e-4$ ,  $\Gamma_M = 0.0404$ ); 3 ( $\Gamma_E = 6.3e-4$ ,  $\Gamma_M = 0.141$ ); 4 ( $\Gamma_E = 6.3e-4$ ,  $\Gamma_M = 1.8$ ).

| miRNA strength    | No. Cells with E2F < 0.01 |      |      |      | No. of Cells with E2F > 1.0 |      |      |     |
|-------------------|---------------------------|------|------|------|-----------------------------|------|------|-----|
|                   | 1                         | 2    | 3    | 4    | 1                           | 2    | 3    | 4   |
| No pulse, S=0.8   | 4360                      | 4526 | 4755 | 9188 | 3144                        | 2720 | 1982 | 4   |
| With pulse, S=0.8 | 254                       | 275  | 296  | 7120 | 5705                        | 5009 | 3759 | 12  |
| No pulse, S=1.0   | 1232                      | 1303 | 1413 | 4741 | 5356                        | 4844 | 3839 | 101 |
| With pulse, S=1.0 | 43                        | 45   | 50   | 2719 | 6163                        | 5608 | 4476 | 107 |

**Supplementary Table 2. Summary of stochastic simulation results.** The descriptive statistics of the E2F values from 10,000 simulations are given for each of the plots in Fig. 4.

| Pulse | Final S | $\Gamma_E$ | $\Gamma_M$ | Average E2F | 25 <sup>th</sup> Percentile E2F | Median E2F | 75 <sup>th</sup> Percentile E2F |
|-------|---------|------------|------------|-------------|---------------------------------|------------|---------------------------------|
| No    | 0.8     | 0          | 0          | 5.90e-01    | 1.82e-03                        | 6.14e-01   | 1.10e+00                        |
| No    | 0.8     | 6.3e-4     | 0.0404     | 5.46e-01    | 1.73e-03                        | 5.11e-01   | 1.04e+00                        |
| No    | 0.8     | 6.3e-4     | 0.141      | 4.69e-01    | 1.60e-03                        | 9.99e-02   | 9.12e-01                        |
| No    | 0.8     | 6.3e-4     | 1.8        | 1.41e-02    | 9.00e-04                        | 1.29e-03   | 3.00e-03                        |
| Yes   | 0.8     | 0          | 0          | 9.65e-01    | 7.48e-01                        | 1.03e+00   | 1.28e+00                        |
| Yes   | 0.8     | 6.3e-4     | 0.0404     | 9.18e-01    | 7.01e-01                        | 9.86e-01   | 1.23e+00                        |
| Yes   | 0.8     | 6.3e-4     | 0.141      | 8.33e-01    | 6.12e-01                        | 8.95e-01   | 1.14e+00                        |
| Yes   | 0.8     | 6.3e-4     | 1.8        | 1.46e-01    | 2.40e-03                        | 1.18e-02   | 2.03e-01                        |
| No    | 1.0     | 0          | 0          | 1.06e+00    | 8.29e-01                        | 1.06e+00   | 1.30e+00                        |
| No    | 1.0     | 6.3e-4     | 0.0404     | 1.00e+00    | 7.77e-01                        | 1.00e+00   | 1.24e+00                        |
| No    | 1.0     | 6.3e-4     | 0.141      | 8.95e-01    | 6.72e-01                        | 8.97e-01   | 1.12e+00                        |
| No    | 1.0     | 6.3e-4     | 1.8        | 4.30e-02    | 2.41e-03                        | 4.78e-03   | 1.20e-02                        |
| Yes   | 1.0     | 0          | 0          | 1.11e+00    | 8.83e-01                        | 1.09e+00   | 1.33e+00                        |
| Yes   | 1.0     | 6.3e-4     | 0.0404     | 1.06e+00    | 8.41e-01                        | 1.05e+00   | 1.27e+00                        |
| Yes   | 1.0     | 6.3e-4     | 0.141      | 9.75e-01    | 7.55e-01                        | 9.60e-01   | 1.18e+00                        |
| Yes   | 1.0     | 6.3e-4     | 1.8        | 2.00e-01    | 8.91e-03                        | 4.03e-02   | 3.52e-01                        |

**Supplementary Table 3. Range of parameter values used in noise susceptibility and noise amplification analysis.** These are the range of parameter values used to plot Fig. 5 and Supplementary Figs. 2-6. The values of the other parameters not indicated below are found in Table 1.

|              | $S$                | $\Gamma_E$  | $\Gamma_M$ | $k_E$        |
|--------------|--------------------|-------------|------------|--------------|
| Fig. 5       | [1.47e-1, 2.47]    | [0, 7.2e-3] | [0, 5e-2]  | 0.4          |
| Supp. Fig. 2 | [1.47e-1, 4.21]    | [0, 3e-3]   | [0, 0.8]   | 0.4          |
| Supp. Fig. 3 | [1.80e-1, 6.25e-1] | [0, 2e-3]   | 0          | [0.25, 0.35] |
| Supp. Fig. 4 | [2.28e-1, 1.28]    | 0           | [0, 9e-2]  | [0.2, 0.3]   |
| Supp. Fig. 5 | [2.28e-1, 2.21]    | 0           | [0, 0.4]   | [0.25, 0.3]  |
| Supp. Fig. 6 | [2.28e-1, 6.25e-1] | [0, 2e-3]   | 0          | [0.25, 0.3]  |

**Supplementary Table 4. Parameters used in Parameter Sensitivity Analysis.**

Combinations of these parameters yield 3,168 parameter sets used to plot Supplementary Fig. 7. All other parameter values are given in Table 1.

| Parameter  | Values                                                                 |
|------------|------------------------------------------------------------------------|
| $S$        | 0.8, 1.0, 2.0, 3.0, 4.0, 5.0                                           |
| $\Gamma_E$ | 0, 6.36e-4, 7.5e-4, 1.5e-3, 2.05e-3, 3e-3, 4.88e-3, 6.93e-3            |
| $\Gamma_M$ | 0, 1.25e-6, 2.5e-2, 3.75e-2, 4.04e-2, 1.41e-1, 0.2, 0.4, 0.6, 0.8, 1.8 |
| $k_E$      | 0.125, 0.263, 0.274, 0.287, 0.3, 0.35                                  |

## Supplementary Figures

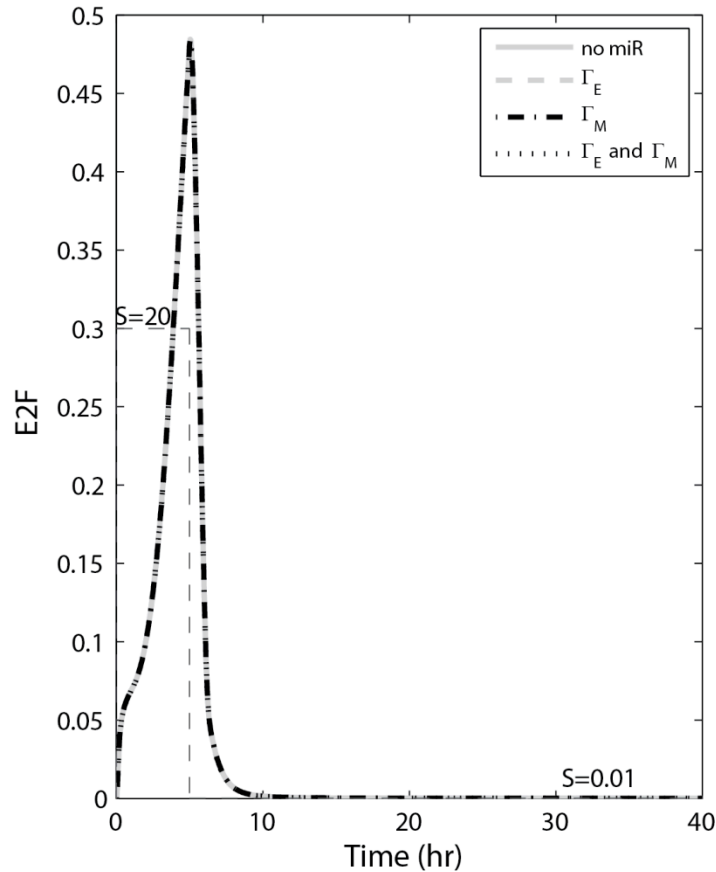

**Supplementary Figure 1. The R-model is excitable.** A serum pulse ( $S=20$  for 5 hours) causes the system to initially proceed to the on state (the on state is  $E2F > 0.01$ , see Fig. 3b), but rapidly goes to the off state after the pulse was removed (final  $S=0.01$ ). Grey solid lines (no miR):  $\Gamma_M=0$ ,  $\Gamma_E=0$ ; Dashed grey lines ( $\Gamma_E$ ):  $\Gamma_M=0$ ,  $\Gamma_E=6.3e-4$ ; Black dash-dot lines ( $\Gamma_M$ ):  $\Gamma_M=0.141$ ,  $\Gamma_E=0$ ; Black dotted lines ( $\Gamma_E$  and  $\Gamma_M$ ):  $\Gamma_M=0.141$ ,  $\Gamma_E=6.3e-4$ .

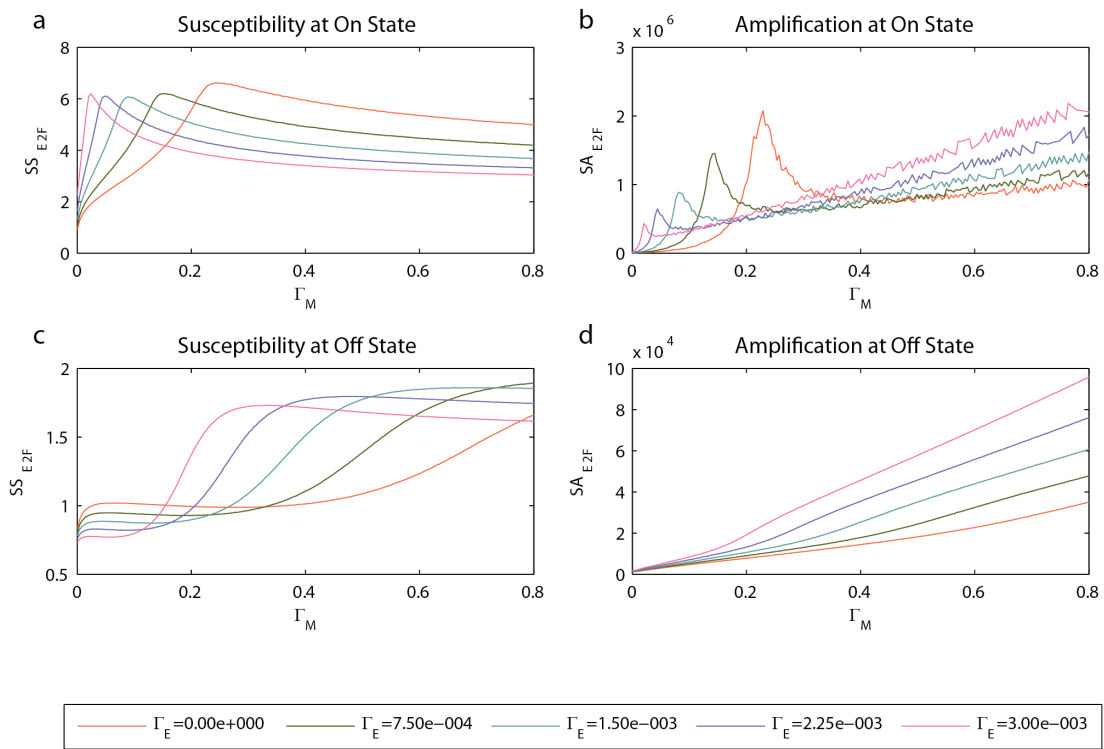

**Supplementary Figure 2.** Noise amplification ( $SA$ ) and noise susceptibility ( $SS$ ) curves for E2F as parameters  $\Gamma_M$  and  $\Gamma_E$  vary. **(a)** Noise susceptibility at the on state. **(b)** Noise amplification at the on state. **(c)** Noise susceptibility at the off state. **(d)** Noise amplification at the off state. 5 different values of parameter  $\Gamma_E$  were used (legend bar) and the values of the other parameters are given in Table 1. Initial conditions that lead to the on and off states were chosen, and the model values at the steady states were used in calculating noise amplification and susceptibility (Methods).

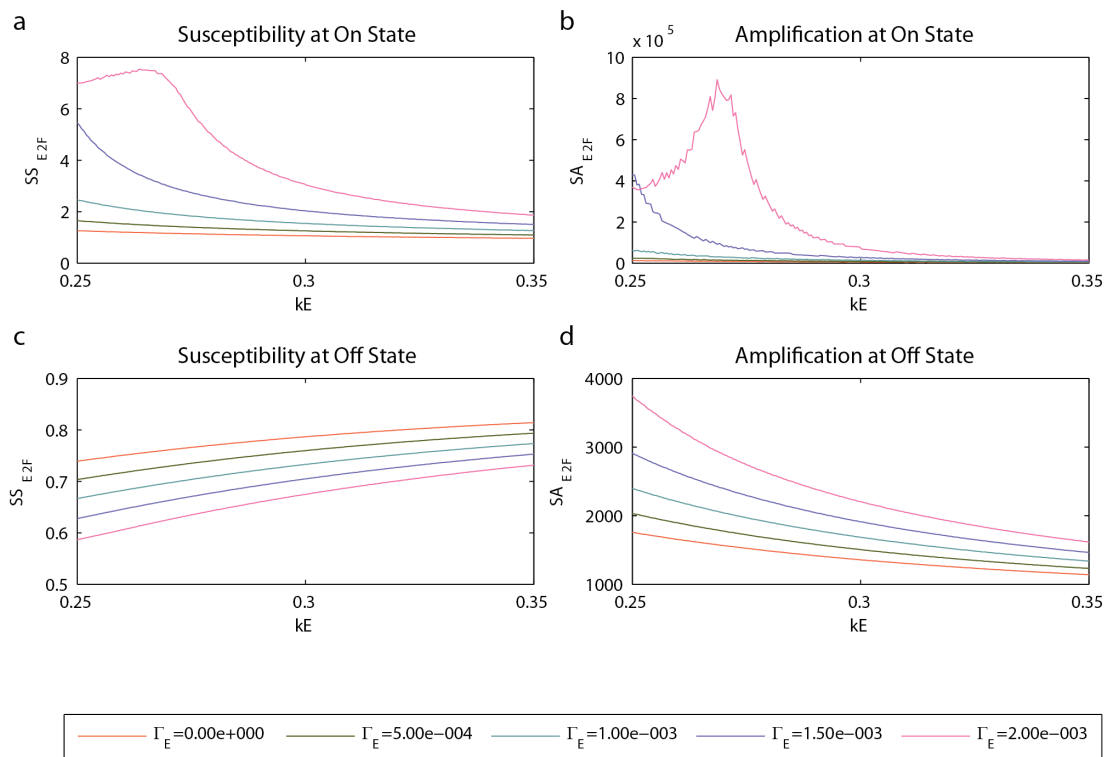

**Supplementary Figure 3.** Noise amplification ( $SA$ ) and noise susceptibility ( $SS$ ) curves for E2F as parameters  $\Gamma_E$  and  $k_E$  vary. **(a)** Noise susceptibility at the on state. **(b)** Noise amplification at the on state. **(c)** Noise susceptibility at the off state. **(d)** Noise amplification at the off state. 5 different values of parameter  $\Gamma_E$  were used (legend bar) and the values of the other parameters are given in Table 1. Initial conditions that lead to the on and off states were chosen, and the model values at the steady states were used in calculating noise amplification and susceptibility (Methods).



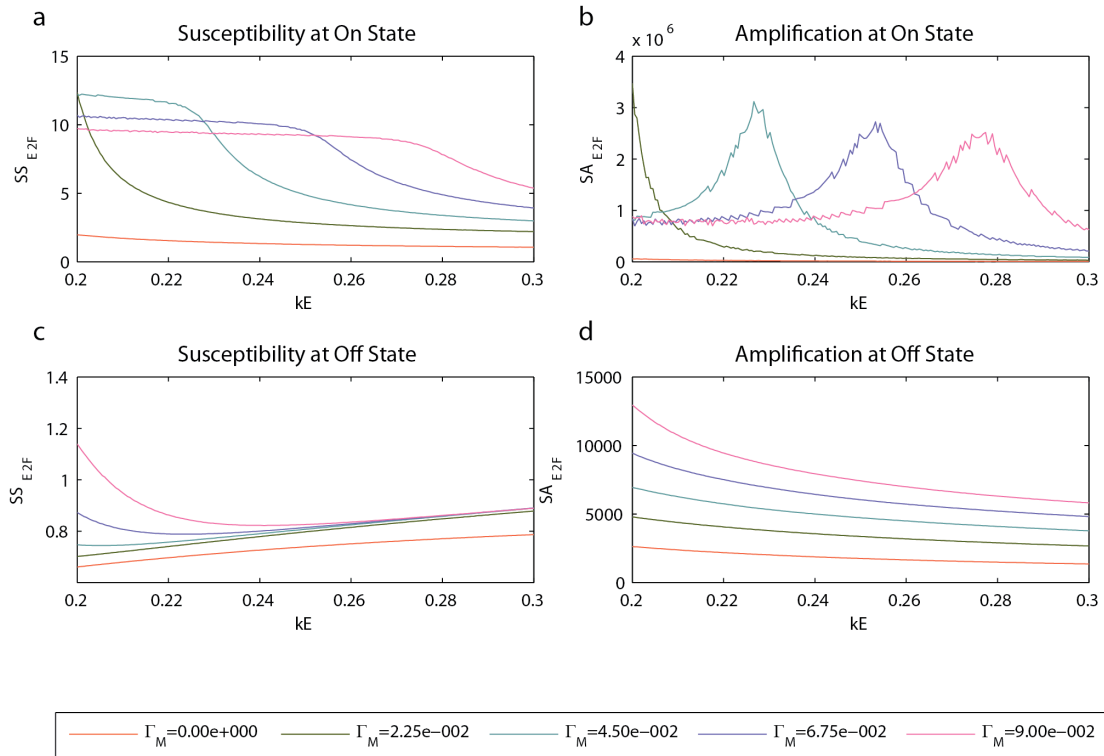

**Supplementary Figure 4.** Noise amplification ( $SA$ ) and noise susceptibility ( $SS$ ) curves for E2F as parameters  $\Gamma_M$  and  $k_E$  vary. **(a)** Noise susceptibility at the on state. **(b)** Noise amplification at the on state. **(c)** Noise susceptibility at the off state. **(d)** Noise amplification at the off state. 5 different values of parameter  $\Gamma_M$  were used (legend bar) and the values of the other parameters are given in Table 1. Initial conditions that lead to the on and off states were chosen, and the model values at the steady states were used in calculating noise amplification and susceptibility (Methods).

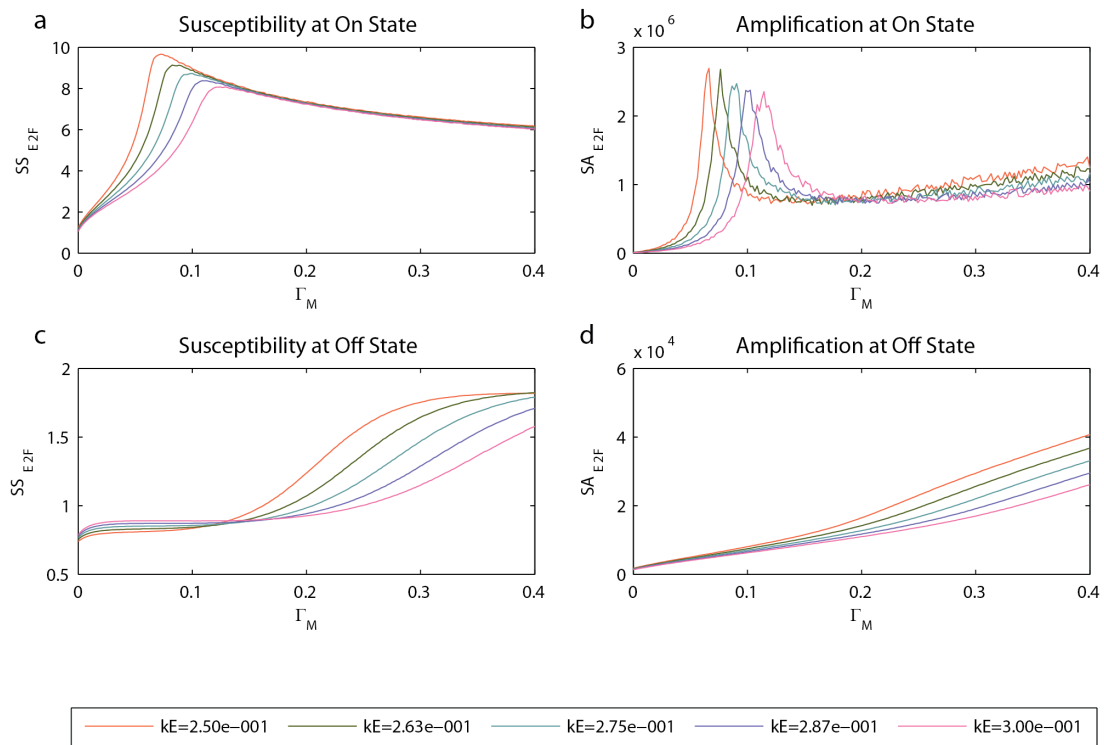

**Supplementary Figure 5.** Noise amplification ( $SA$ ) and noise susceptibility ( $SS$ ) curves for E2F as parameters  $k_E$  and  $\Gamma_M$  vary. **(a)** Noise susceptibility at the on state. **(b)** Noise amplification at the on state. **(c)** Noise susceptibility at the off state. **(d)** Noise amplification at the off state. 5 different values of parameter  $k_E$  (legend bar) were used and the values of the other parameters are given in Table 1. Initial conditions that lead to the on and off states were chosen, and the model values at the steady states were used in calculating noise amplification and susceptibility (Methods).

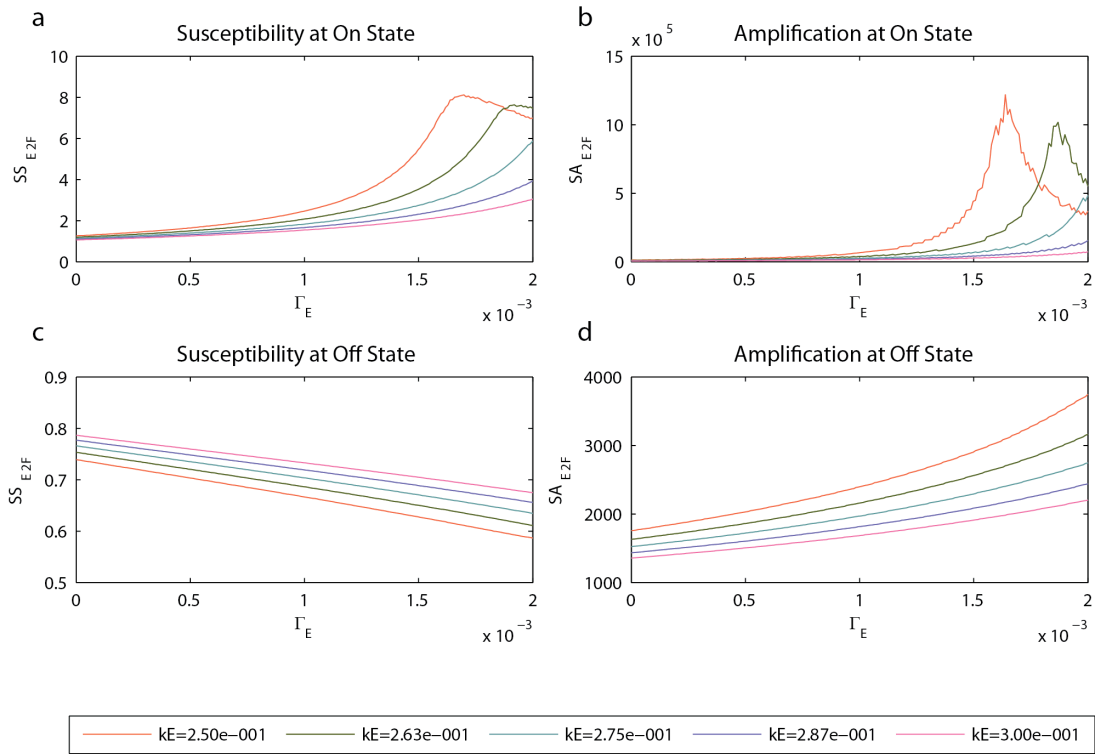

**Supplementary Figure 6.** Noise amplification ( $SA$ ) and noise susceptibility ( $SS$ ) curves for E2F as parameters  $k_E$  and  $\Gamma_E$  vary. **(a)** Noise susceptibility at the on state. **(b)** Noise amplification at the on state. **(c)** Noise susceptibility at the off state. **(d)** Noise amplification at the off state. 5 different values of parameter  $k_E$  (legend bar) were used and the values of the other parameters are given in Table 1. Initial conditions that lead to the on and off states were chosen, and the model values at the steady states were used in calculating noise amplification and susceptibility (Methods).

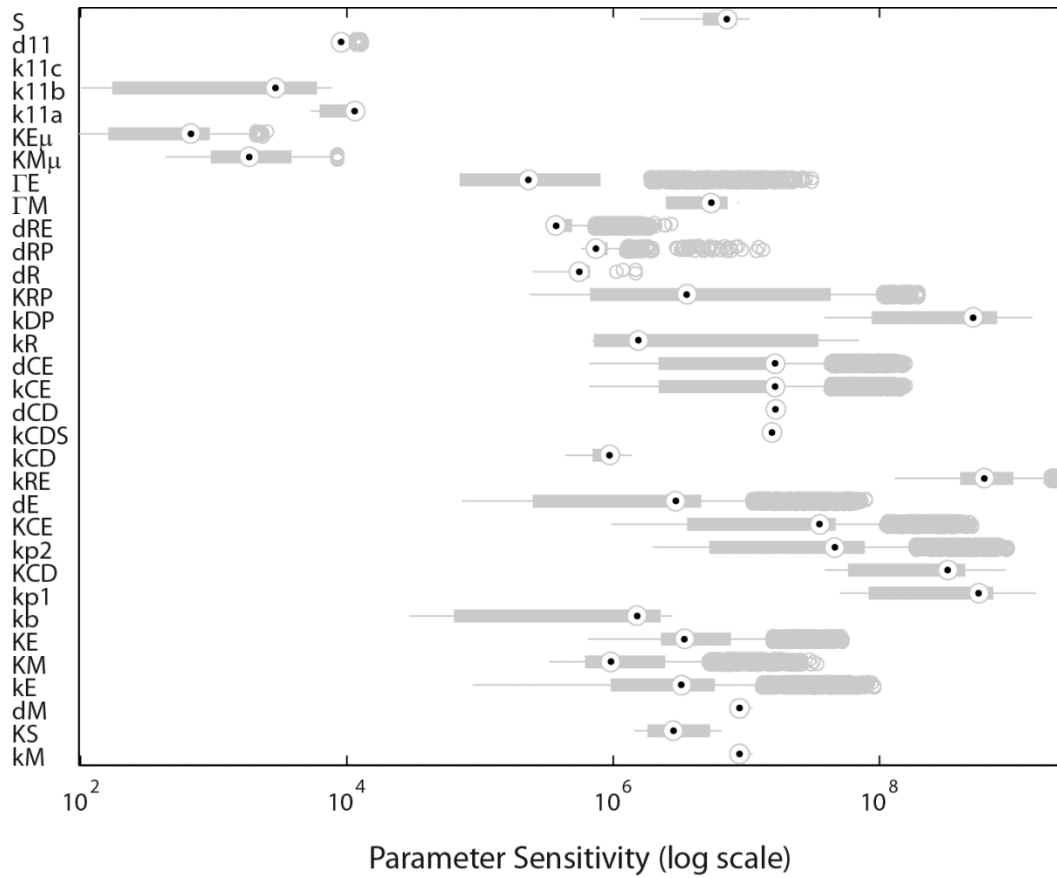

**Supplementary Figure 7.** Box plots of time-dependent parameter sensitivities for each of the 33 model parameters. 3,168 parameter sets were used and the parameter sensitivity (Eq. (11) in main text) was calculated for each. The dark circles indicate the median. Nominal parameter values are in Supplementary Table 4.
